# Supplementary material
Source: PubMed Central journal article supplement (PMC7181406)
Supplement: NIHMS1568996-supplement-1.pdf [file NIHMS1568996-supplement-1.pdf]

# **A Combinatorial MAP Code Dictates Polarized Microtubule Transport**

**Monroy *et al.***

**Supplemental Figures and Figure Legends**

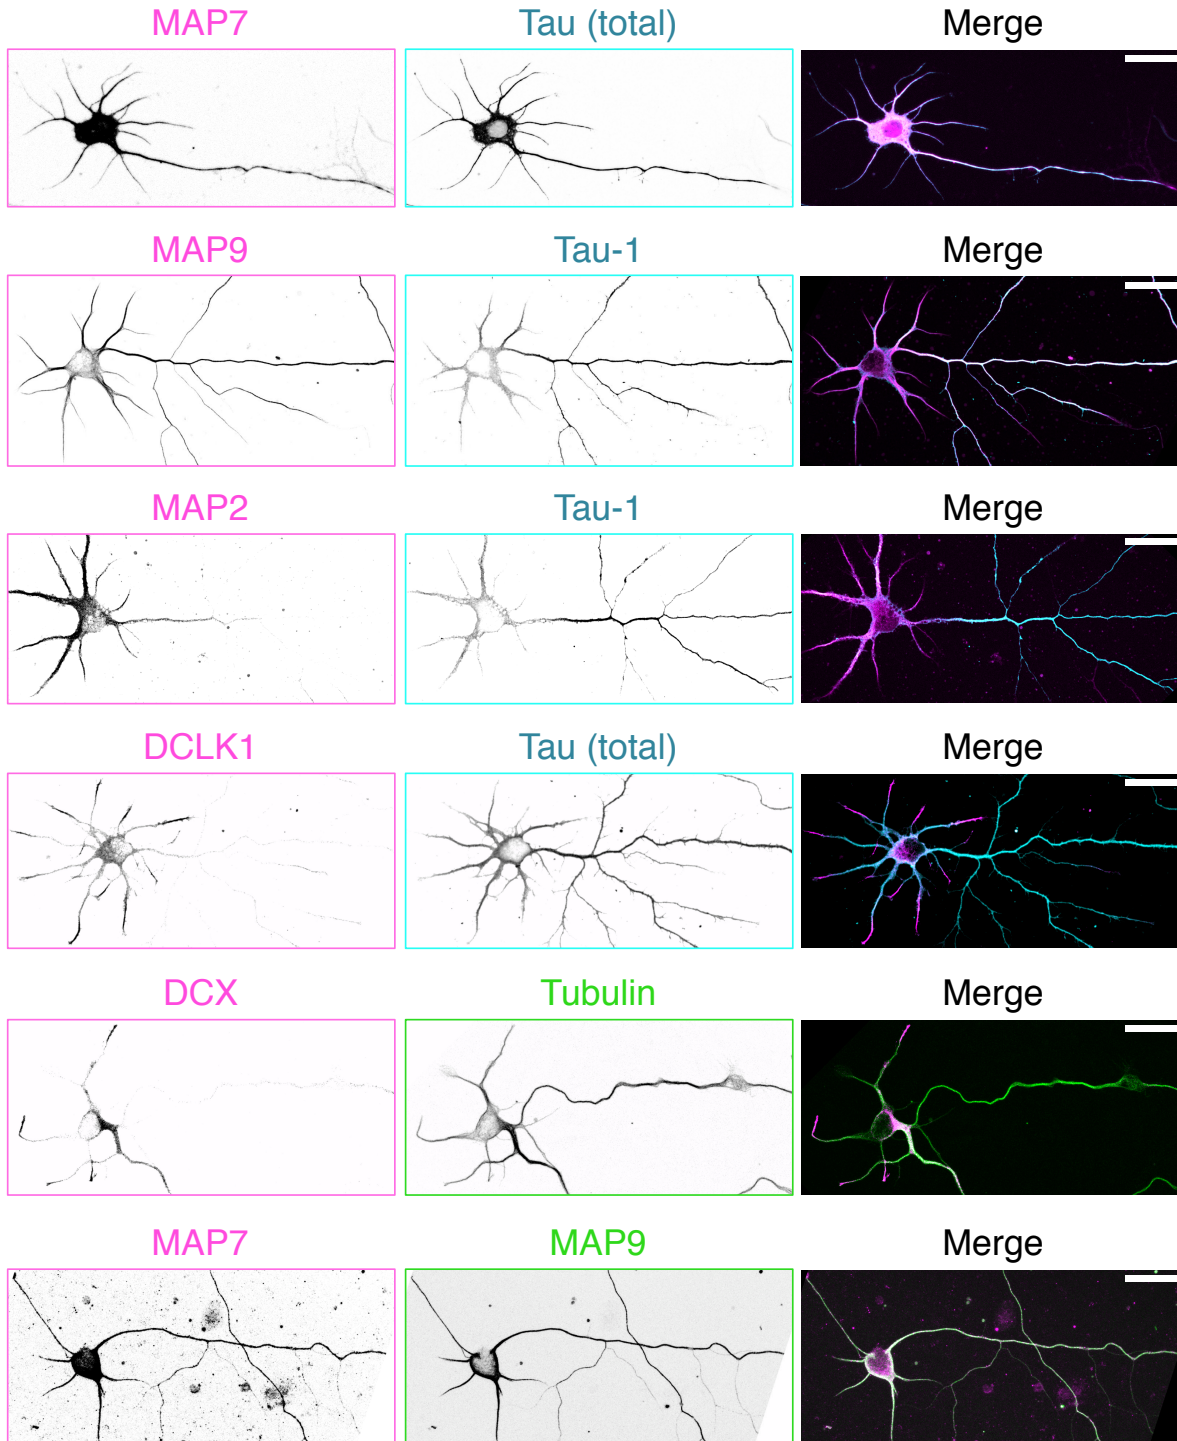

**Figure S1. Localization patterns of MAPs in DIV4 mammalian neurons. Related to Figures 1-2.** Immunocytochemistry of mouse DIV4 neuronal cultures with antibodies against dephospho-tau (Tau-1), total tau, MAP7, MAP2, MAP9, DCLK1, DCX, and tubulin. Scale bars are 25  $\mu$ m. n = three independent neuronal cultures for all conditions.



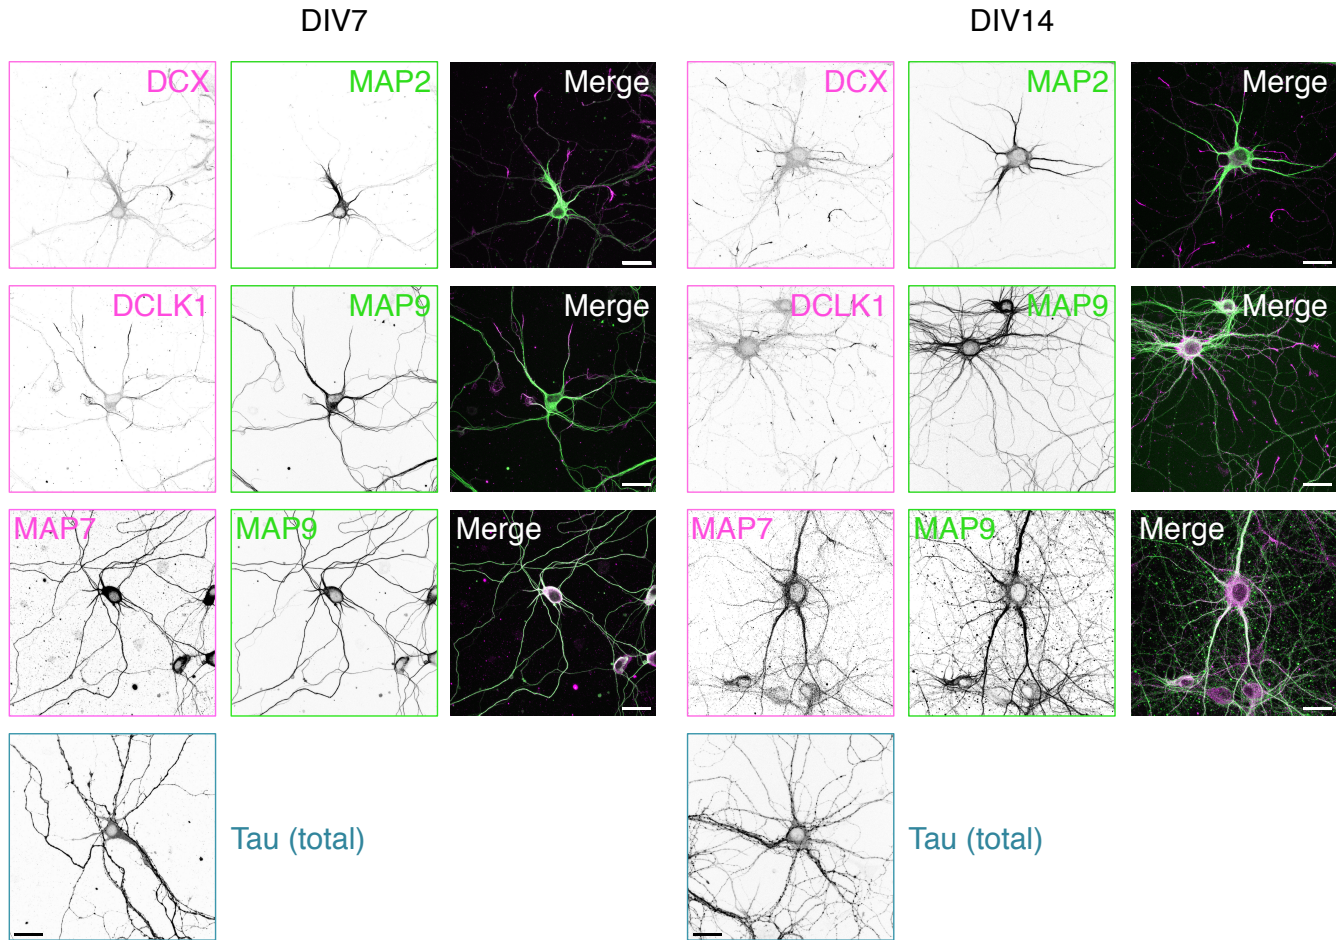

**Figure S2. Localization patterns of MAPs in DIV7 and DIV14 mammalian neurons. Related to Figures 1-2.** Immunocytochemistry of mouse DIV4 neuronal cultures with antibodies against dephospho-tau (Tau-1), total tau, MAP7, MAP2, MAP9, DCLK1, DCX, and tubulin. Scale bars are 25  $\mu\text{m}$ . n = two independent neuronal cultures for all conditions.

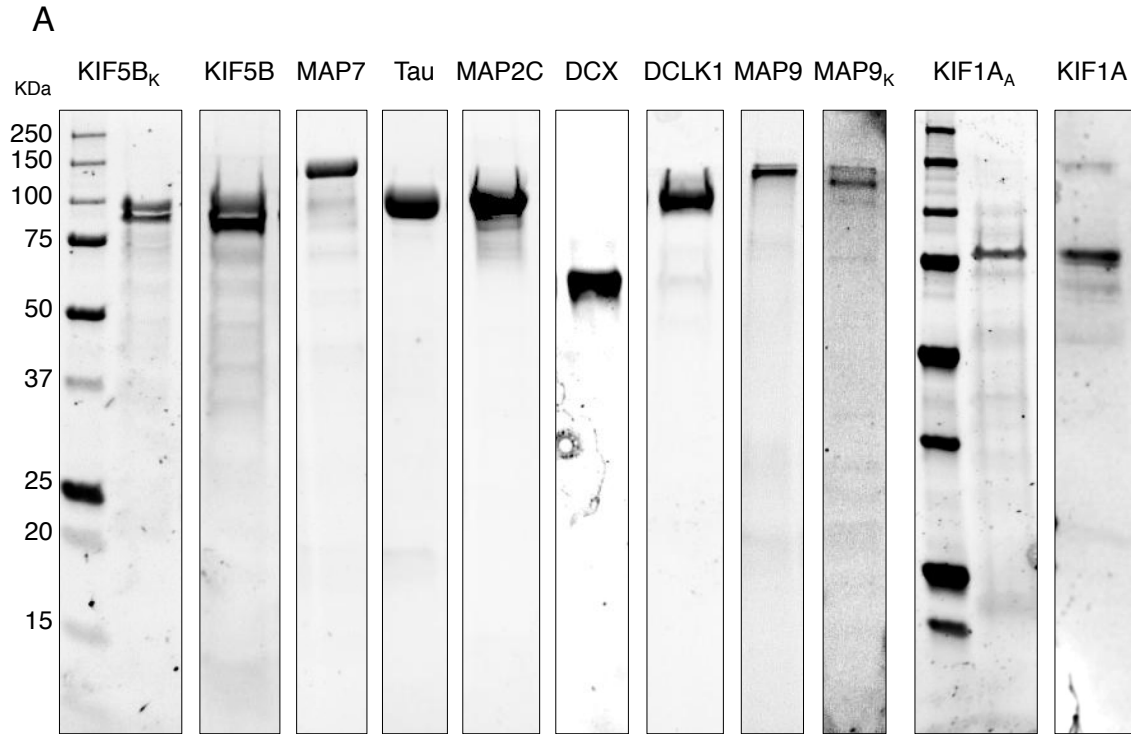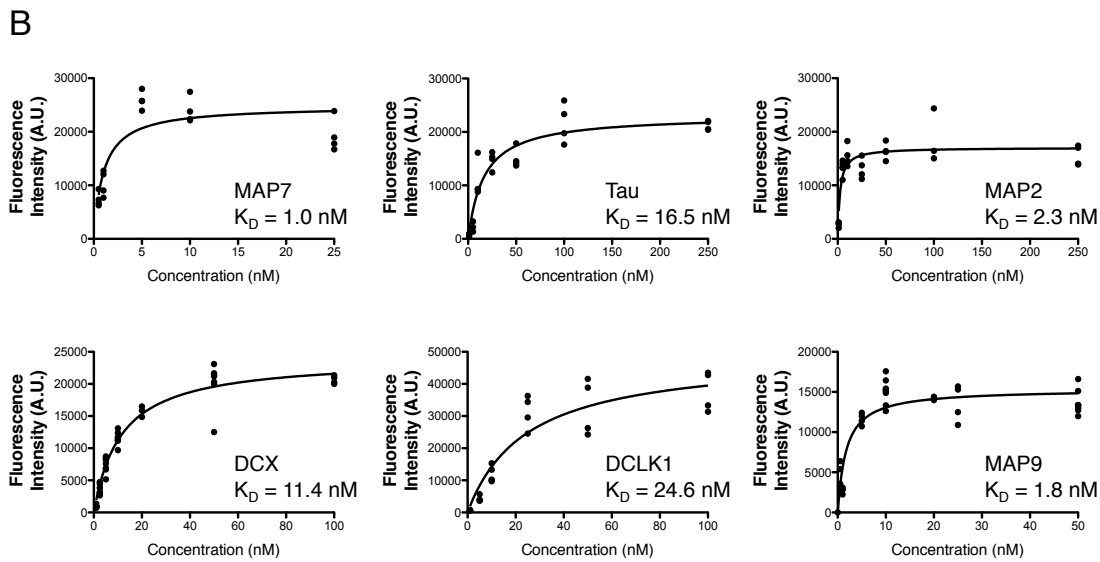

**Figure S3. Gels and saturation curves for purified recombinant proteins used in this study. Related to Figures 1-4. (A)** Coomassie Blue-stained SDS-PAGE gels of KIF5B<sub>K</sub>-mScarlet, KIF5B-mScarlet, sfGFP-MAP7, sfGFP-tau, sfGFP-MAP2, DCX-sfGFP, sfGFP-DCLK1, sfGFP-MAP9, sfGFP-MAP9<sub>K</sub>, KIF1A<sub>A</sub>-mScarlet, and KIF1A-mScarlet. **(B)** Quantification of fluorescence intensity of microtubule-bound MAPs (all tagged with sfGFP) plotted against concentration. The  $K_D$  for each MAP are indicated.

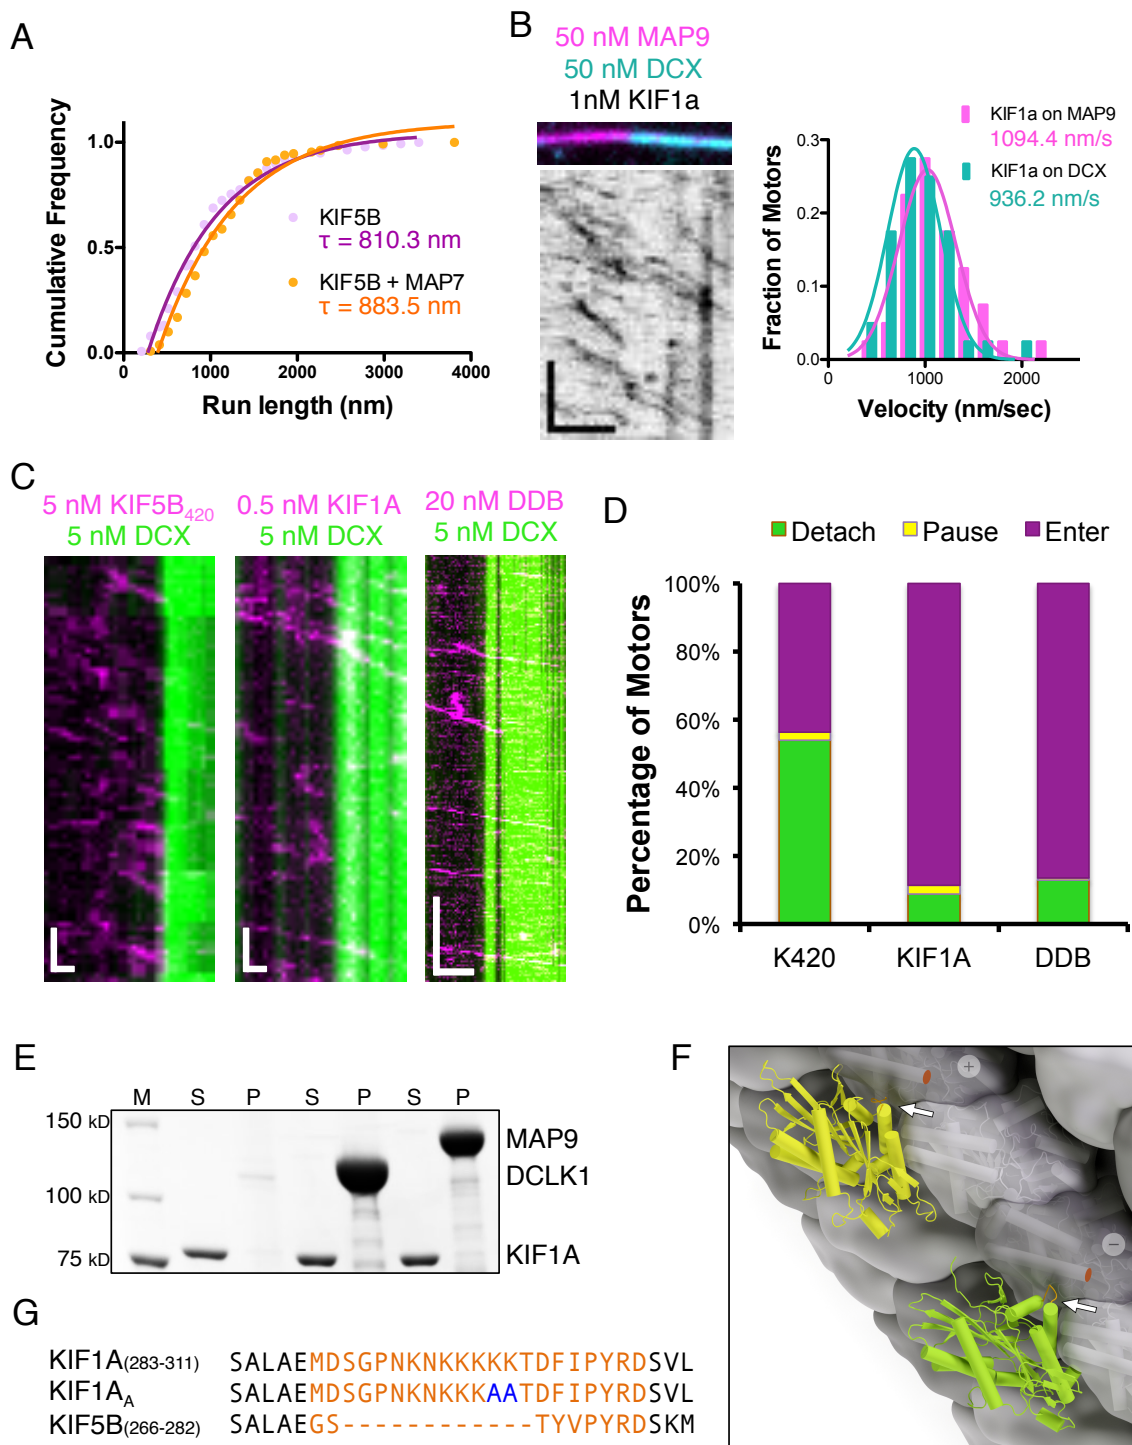

**Figure S4. Dissection of the differential molecular effects of MAPs on motors. Related to Figures 1, 2, 3, and 5. (A)** Cumulative frequency distribution plot of KIF5B-mScarlet (kinesin-1) run lengths (+ 1 mM ATP) in the absence and presence of sfGFP-MAP7 fit to a one phase exponential decay.  $\tau = 810.3$  and  $984.3$  nm for KIF5B and KIF5B + MAP7, respectively ( $P < 0.0001$ ;  $n = 138$  and  $131$  KIF5B motors for KIF5B alone and KIF5B + MAP7, respectively, from two independent trials). **(B)** TIRF-M image and kymograph of 1nM KIF1A-mScarlet (kinesin-3) in the presence of 50 nM BFP-DCX (cyan) and 50

nM sfGFP-MAP9 (pink) + 1 mM ATP. Scale bar: 2  $\mu\text{m}$  ( $x$ ) and 5 sec ( $y$ ). Right: velocity histograms with Gaussian fits of KIF1A motors (+ 1 mM ATP) on MAP9-decorated segments before the MAP9-DCX boundary and on the DCX-decorated segment immediately after the boundary. Means  $\pm$  s.d. are  $1094.4 \pm 343.7$  and  $936.2 \pm 321.8$  nm/sec for KIF1A on the MAP9 segment and DCX segment, respectively ( $n = 40$  motors that crossed the MAP9-DCX boundary from two independent experiments). **(C)** Kymographs depicting K420-mScarlet (kinesin-1), KIF1A-mScarlet (kinesin-3), and DDB-TMR (dynein-dynactin-BicD) motors encountering a DCX-sfGFP patch. **(D)** Quantification of the percent of K420, KIF1A and DDB motors that detach, pause, or pass DCX patches. For K420 motors, 54.0 % detach, 2.3 % pause, and 43.7 % enter DCX patches (174 events from two independent experiments). For KIF1A motors, 8.7 % detach, 2.6 % pause, and 88.7 % enter DCX patches (115 events from two independent experiments). For DDB motor complexes, 12.8 % detach, 0.7 % pause, and 86.5 % enter DCX patches (133 events from two independent experiments). **(E)** Coomassie Blue-stained SDS-PAGE gel of FLAG pull-downs with purified recombinant proteins. Either full-length sfGFP-MAP9-FLAG or sfGFP-DCLK1-FLAG were used for pull-down assays with KIF1A-mScarlet ( $n = 3$  independent trials per assay). M = marker, S = supernatant, and P = pellet. **(F)** Visualization of kinesin-3 (KIF1A, PDB: 1i5s; yellow) and kinesin-1 (KIF5B, PDB: 4hna; green) motor domains on the microtubule. Arrows point to loop 12 in orange (KIF5B residues 271-279 and KIF1A residues 288-308; 14 residues of KIF1A, 290-303, are not structurally resolved). Red dots mark C-termini on beta-tubulin, where disordered C-terminal tails are not structurally resolved. **(G)** Sequence alignment comparing loop 12 of kinesin-3 (KIF1A) and kinesin-1 (KIF5B). Sequence of KIF1A<sub>A</sub> indicates the two lysines that were mutated to alanines (blue) for the studies in Figure 3A.

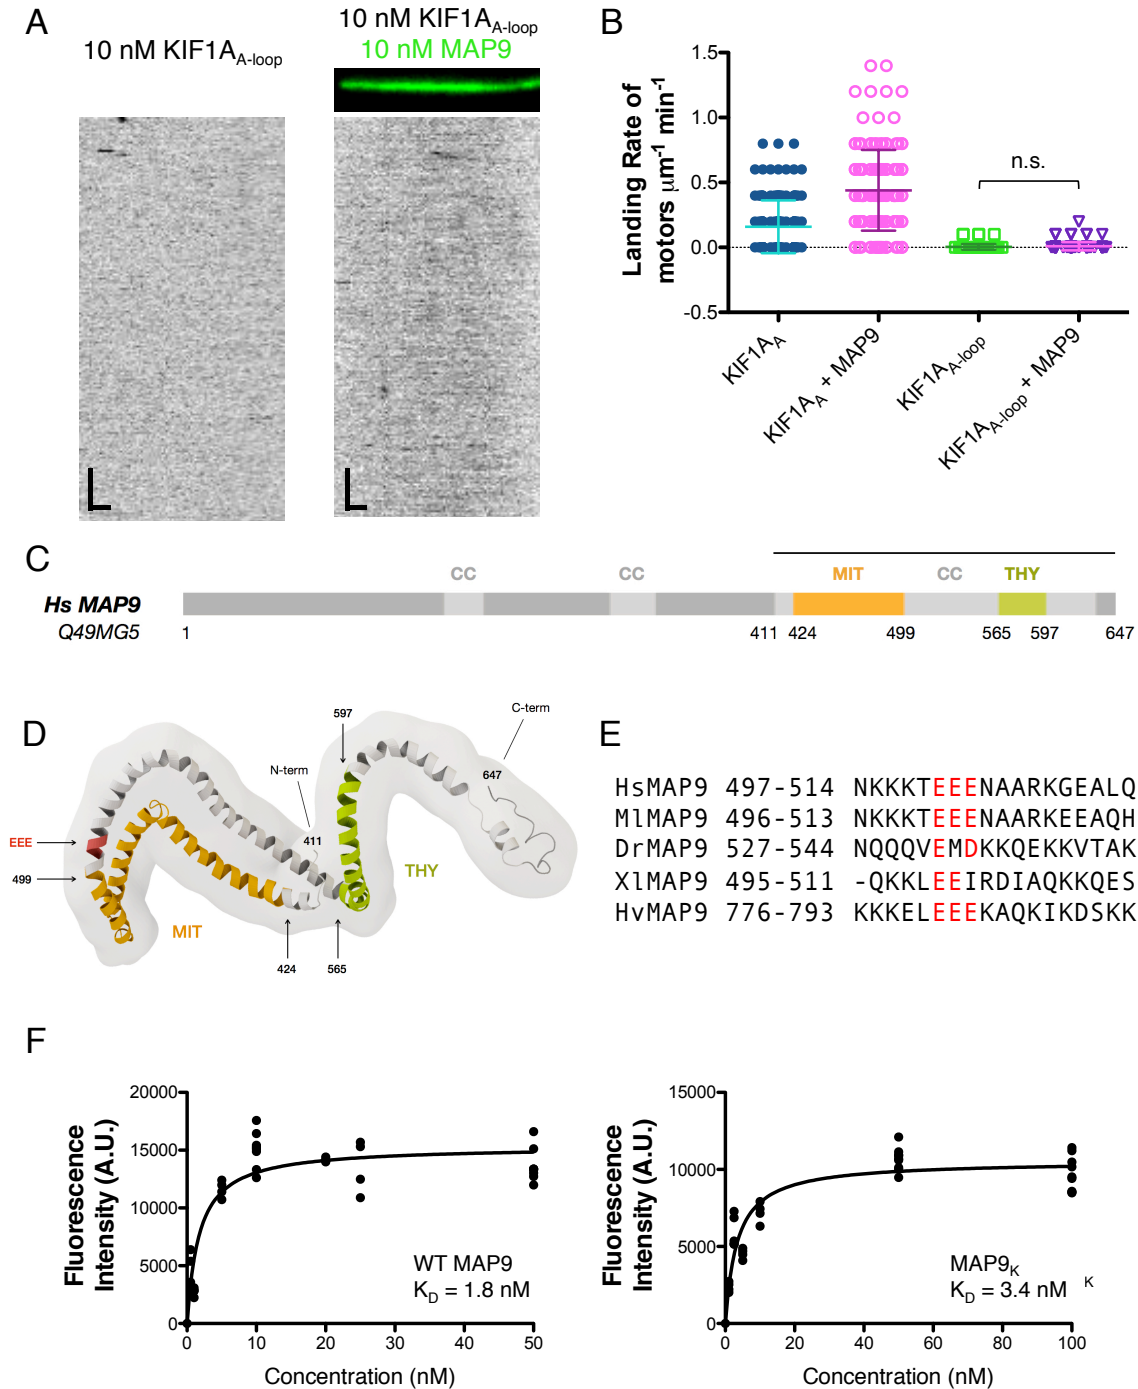

**Figure S5. Dissection of the MAP9 interaction with kinesin-3. Related to Figure 3. (A)** TIRF-M images and kymographs of 10 nM KIF1A<sub>A-loop</sub>-mScarlet + 1 mM ATP in the absence and presence of 10 nM sfGFP-MAP9 (green). Images are 10.3  $\mu\text{m}$  wide. Scale bars: 1  $\mu\text{m}$  ( $x$ ) and 5 sec ( $y$ ). **(B)** Quantification of the landing rates of 5nM KIF1A<sub>A-loop</sub>-mScarlet compared with KIF1A<sub>A</sub>-mScarlet + 1 mM ATP in the absence and presence of MAP9. KIF1A<sub>A</sub> data are reproduced from Figure 3 for comparison. Means  $\pm$  s.d. for motors  $\mu\text{m}^{-1} \text{min}^{-1}$  are:  $0.005 \pm 0.02$  for KIF1A<sub>A-loop</sub> alone ( $n = 103$  kymographs from two independent trials) and  $0.009 \pm 0.03$  for KIF1A<sub>A-loop</sub> + MAP9 ( $n = 103$  kymographs from two independent trials). All datapoints are plotted with lines indicating means  $\pm$  s.d.  $P$

= 0.26 using a student's t-test for KIF1A<sub>A-loop</sub> vs. KIF1A<sub>A-loop</sub> + MAP9. **(C)** Domains and motifs of human MAP9. CC: coiled-coil regions. MIT: microtubule interacting and trafficking domain. THY: thymosin beta actin-binding motif (Venoux et al., 2008). **(D)** Model of the MAP9 C-terminus (aa 411-647), predicted by *de novo* and homology modeling (Buchan et al., 2010). **(E)** Sequence alignment between HsMAP9, *Myotis lucifugus* MAP9 (MIMAP9), *Danio rerio* MAP9 (DrMAP9), *Xenopus laevis* (XIMAP9), and *Hydra vulgaris* MAP9 (HvMAP9). It is important to note that hydra MAP9 is ~300 aa longer at the amino-terminus than human MAP9, thus this region corresponds to the same region of the microtubule-binding domain of human MAP9. **(F)** Quantification of fluorescence intensity of microtubule-bound sfGFP-MAP9 or sfGFP-MAP9<sub>EEE>KKK</sub> plotted against concentration. The  $K_D$  for the wild type and mutant MAP9 proteins are indicated.



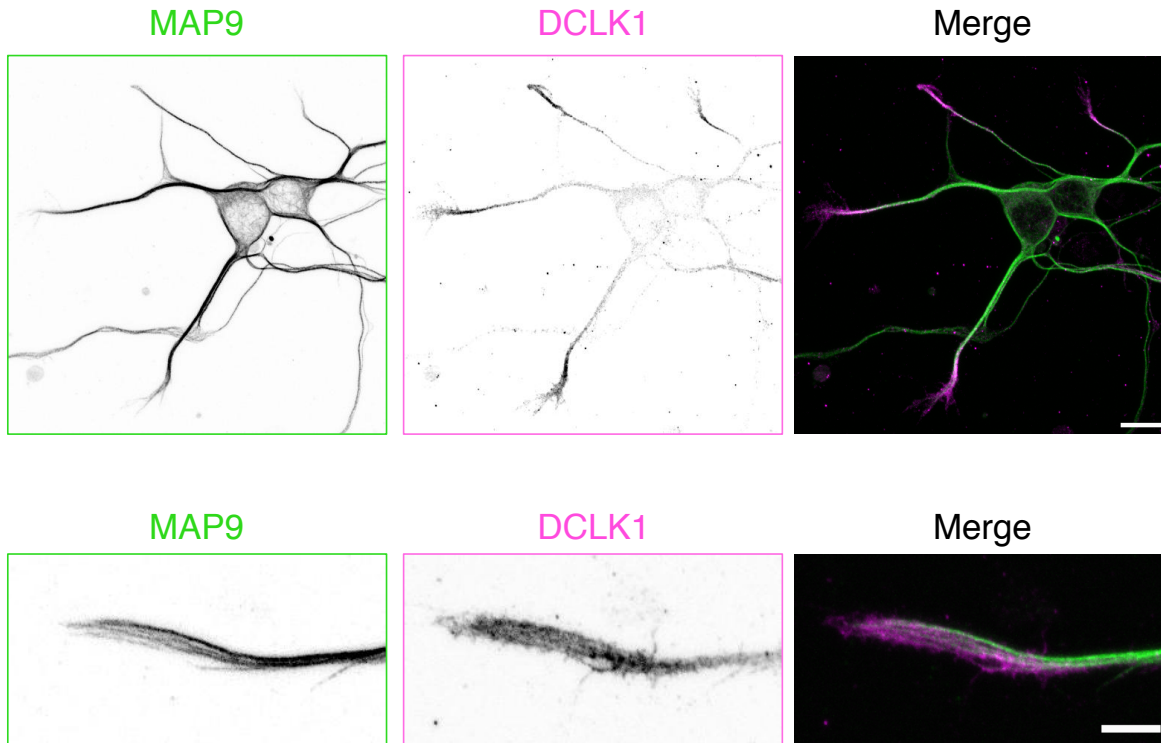

**Figure S6. MAP9 and DCLK1 are inversely correlated in distal dendrites. Related to Figure 6.** Immunocytochemistry of mouse DIV4 neuronal cultures with antibodies against MAP9 and DCLK1. Scale bars are 10  $\mu\text{m}$  for the large image and 5  $\mu\text{m}$  for the zoomed-in image. n = two independent neuronal cultures.
